# Supplementary material
Source: Royal Society of Chemistry journal article supplement (doi:10.1039/d6se00082g)
Supplement: d6se00082g1.pdf [file d6se00082g1.pdf]

**Supporting Information**

**Bio-inspired Electro Active Polymeric Benzimidazole  
Phthalocyanine: A Sustainable Electrocatalyst for Enhanced  
Hydrogen Evolution Reaction**

*Sowmyashree Hadimane<sup>a</sup>, Shambhulinga Aralekallu<sup>b</sup>, Lokesh Koodlur Sannegowda<sup>a\*</sup>*

*<sup>a</sup>Department of Studies in Chemistry, Vijayanagara Sri Krishnadevaraya University,  
Vinayakanagara, Ballari-583105, India*

*<sup>b</sup>Centre for Research in Functional Materials (CRFM), JAIN (Deemed-to-be University), Jain  
Global Campus, Bengaluru 562112, Karnataka, India*

## **Author Information**

Corresponding Author

\*Address: Department of Studies in Chemistry

Vijayanagara Sri Krishnadevaraya University, Jnanasagara Campus, Vinayakanagara,

Ballari-583105, Karnataka, INIDA

Tel: +91 9035500208.

Email: [kslokesh@vskub.ac.in](mailto:kslokesh@vskub.ac.in)

## Experimental section

**Materials:** Ortho-phenylenediamine, OPDA ( $C_6H_4(NH_2)_2$ ), salicylic acid ( $C_7H_6O_3$ ), 4-nitrophthalonitrile (>98%), 4-bromophenol ( $C_6H_5BrO$ ), cobaltous chloride hexahydrate ( $Co(II)Cl_2 \cdot 6H_2O$ , 99.9%), hydrochloric acid (HCl), potassium carbonate ( $K_2CO_3$ ), dimethyl formamide, DMF ( $HCON(CH_3)_2$ ), 1-pentanol ( $C_5H_{12}O$ , >98%), 1,8-diazabicyclo[5,4,0] undec-7-ene DBU, dimethyl sulfoxide DMSO ( $C_2H_6OS$ ), methanol ( $CH_3OH$ , 99.8%), acetone ( $C_3H_6O$ , 99.5%), hexane ( $C_6H_{14}$ , 98.5%), ethanol ( $C_2H_5OH$ , 99.5%), chloroform ( $CHCl_3$ , 99.5%), tetrabutylammonium perchlorate (TBAP), potassium hexacyanoferrate(II) [ $K_4Fe(CN)_6$ ] were purchased from Sigma-Aldrich, India and SD Fine, India. Double-distilled water was used for all the reactions and experiments.

### Characterization techniques:

The synthesized poly[Co(II)TBBImPc] complex was analyzed by UV-visible absorption spectroscopic technique using an Ocean Insight Spectrometer (FLAME-SUV-VIS-ES; Serial no. FLS 04808). The poly[Co(II)TBBImPc] complex in DMSO (5 mg/10 mL) was used for recording the electronic absorption spectrum in the region of 300-800 nm. The FT-IR spectra of the ligands (i)-(iii) and poly[Co(II)TBBImPc] compound were recorded on a PerkinElmer Spectrum in the wavenumber range of 400-4000  $cm^{-1}$  using the KBr pellet method. The mass spectra (2.5 kV, electron impact mode) were measured with Mass spectrometer-MS model: Waters; Synapt G2 High detection Mass spectrometer. The thermal stability of polymeric cobalt(II) benzimidazole-substituted phthalocyanine is studied in the temperature range of 50-950  $^{\circ}C$  with an STA 6000 simultaneous thermal analyzer (PerkinElmer) with a scan rate of 20  $^{\circ}C \cdot min^{-1}$  under air flow (20  $mL \cdot min^{-1}$ ). The surface morphology was imaged using a field-

emission scanning electron microscope (FE-SEM, Carl Zeiss, Germany, Model: EVO LS 15) at 30 kV. The transmission electron microscope (HR-TEM) and HAADF-STEM images were recorded using TALOS 200FG2 at 200 kV. X-ray photoelectron spectroscopy (XPS) analysis was conducted using a SPECSMXPS system. The deconvolution of the high-resolution XPS spectral peaks was obtained using XPS peak 4.1 and origin 8.5 software. The Cyclic Voltammetry (CV), Linear Sweep Voltammetry (LSV), and chronoamperometric experiments were performed using an Electrochemical workstation (Potentiostat CH16005E, CH-Instruments, Inc.) controlled by CH-Instruments Software in a standard three electrode system. Here, Ag/AgCl was used as the reference electrode, Pt-wire as a counter electrode, and bare GCE, or modified GCE was used as the current collector working electrode.

## Mass and NMR spectroscopic analysis

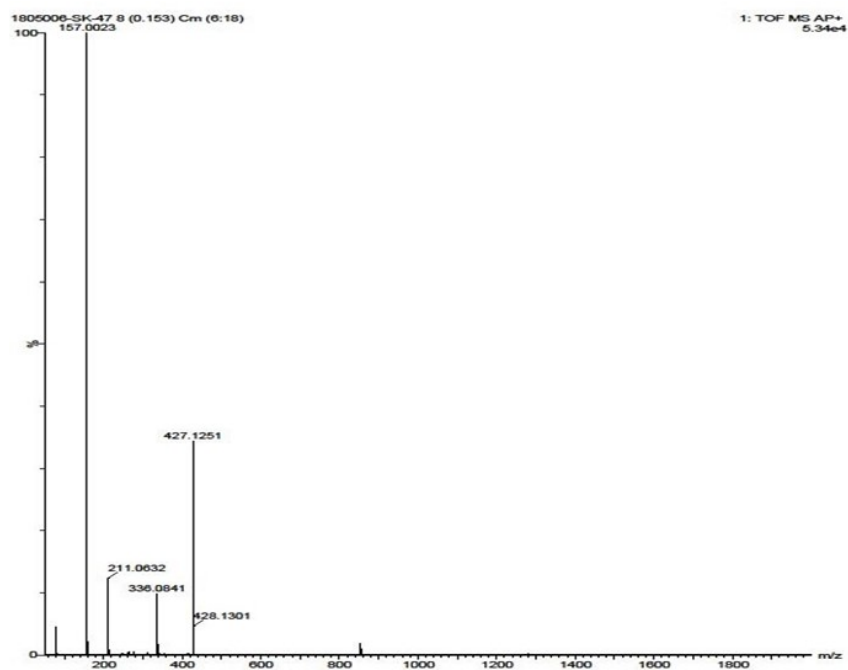

Fig. S1. Mass spectrum of 2-(1H-benzimidazole-2-yl)phenol ligand (*i*), Molecular ion peak at  $m/z = 211$  for  $[M+1H]$

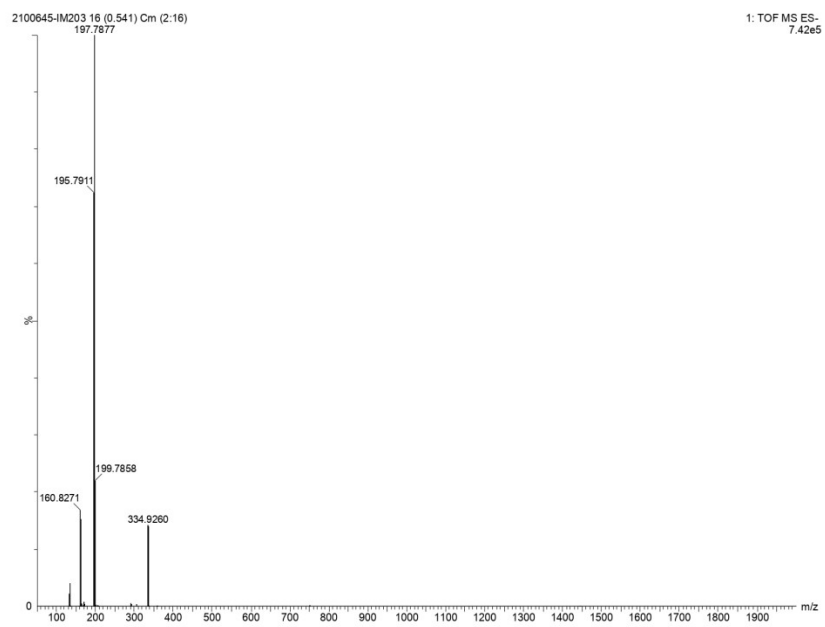

**Fig. S2. Mass spectrum of 4-[2-(1H-benzimidazol-2-yl)benzene-1,2-dicarbonitrile]**

**ligand (ii), Molecular ion peak at  $m/z=334.92$  for [M-2H]**

### NMR spectrum of 4-[2-(1H-benzimidazol-2-yl)benzene-1,2-dicarbonitrile] ligand (ii)

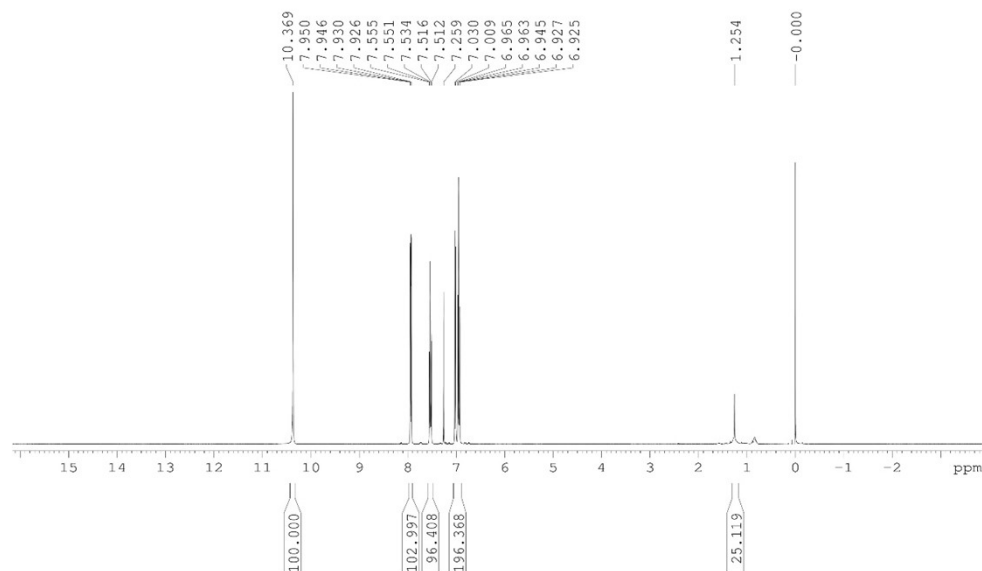

**Fig. S3. NMR spectrum of ligand (ii)**

Ligand (ii) Solvent: Chloroform-d

The peak at  $\delta = 10.36$  ppm (s, 1H) is due to proton of Ar-NH in the ligand (ii);

Here, the presence of benzimidazole Ar-NH group confirmed the attachment of benzene-1,2-dicarbonitrile at the hydroxyl group substitution and also the absence of peak at  $\delta = 5.40$  ppm which is assigned for the -OH group infers the formation of ligand (ii) at the reactive site of -OH functional group; and peaks at  $\delta = 7.950$  to  $6.925$  ppm assigned for Ar-H's of ligand.

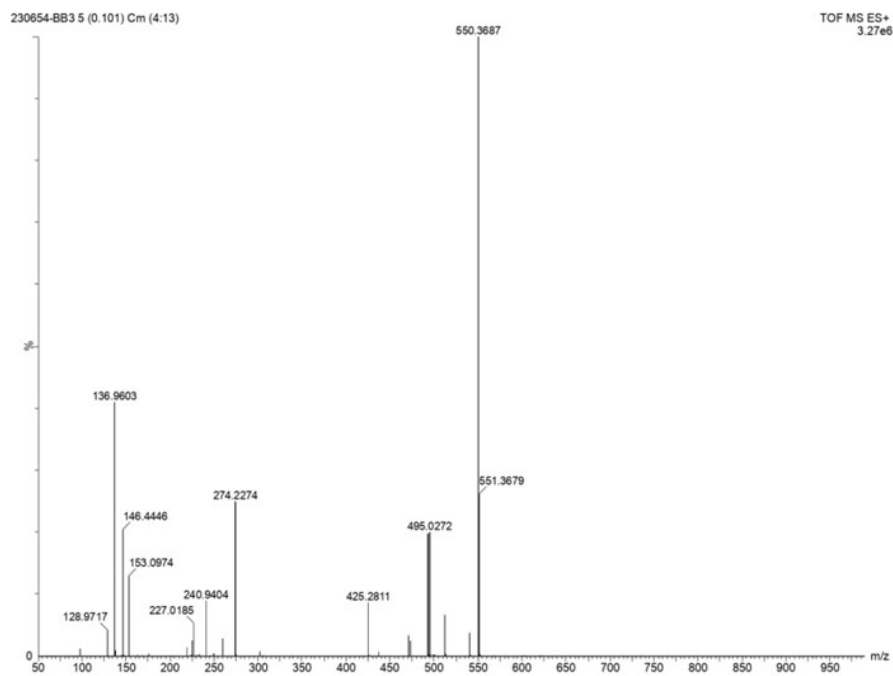

**Fig. S4. Mass spectrum of ligand (iii) of poly[Co(II)TBBImPc]**

**Molecular ion peak at  $m/z= 550.368$  for  $[M-2H]^{-4}$  and  $551.367$  for  $[M-2H]^{-3}$**

NMR spectrum of 4-[2-(1H-benzimidazol-2-yl)benzene-1,2-dicarbonitrile substituted with 4-(4-bromophenoxy)benzene-1,2-dicarbonitrile) ligand (iii)

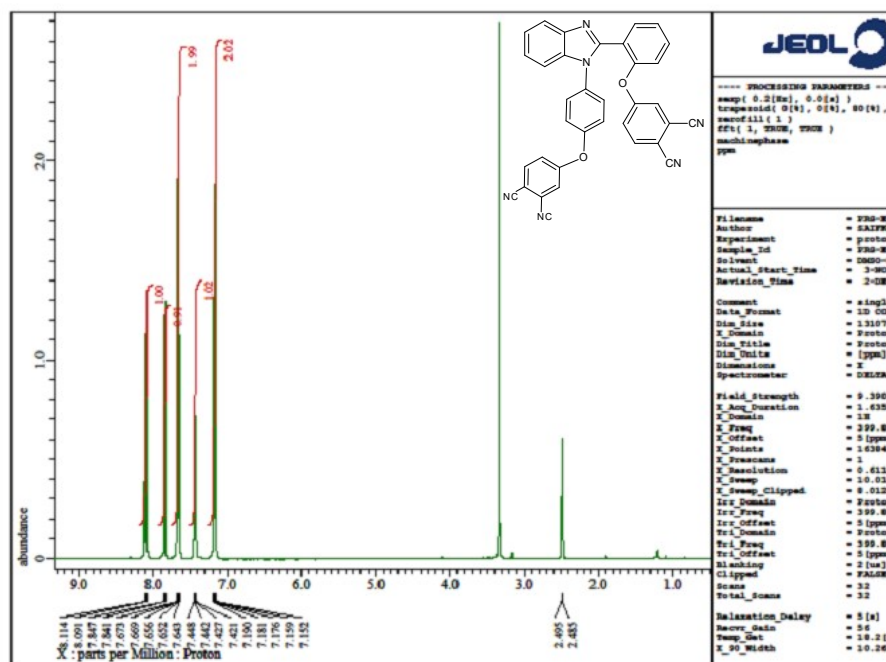

Fig. S5. NMR spectrum of ligand (iii)

Ligand (iii) Solvent: DMSO-d6

The peak at  $\delta = 7.152-8.114$  ppm is due to Ar-H in the ligand (iii)

$\delta = 2.495$  ppm assigned for solvent peak.

And no aromatic -NH peak appeared which confirmed the attachment of benzoxy-substituted ligand.

### NMR spectrum of 4-(4-bromophenoxy)benzene-1,2-dicarbonitrile) ligand

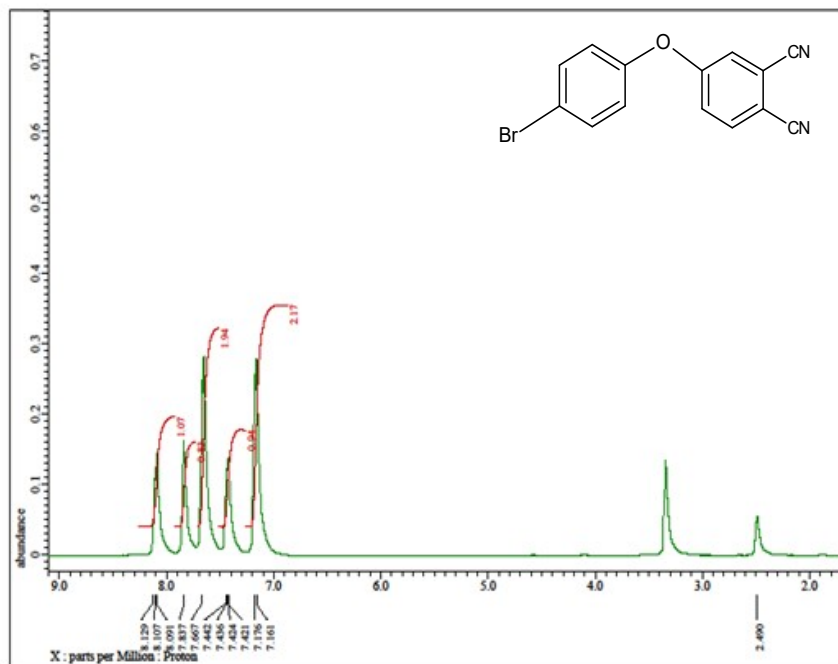

**Fig. S6. NMR spectrum of 4-(4-bromophenoxy)benzene-1,2-dicarbonitrile) ligand**

Solvent: Deuterated DMSO (DMSO-d<sub>6</sub>)

Peak at  $\delta = 7.161$ - $8.129$  ppm (with different coupling constant values) assigned for Ar-H of the ligand

Peak at  $\delta = 2.490$  ppm refers to the DMSO-d<sub>6</sub> solvent peak.

The spectrum did not show the -OH peak at 5.13 ppm and it confirmed the formation of phthalonitrile ligand from the bromo-phenol precursor.

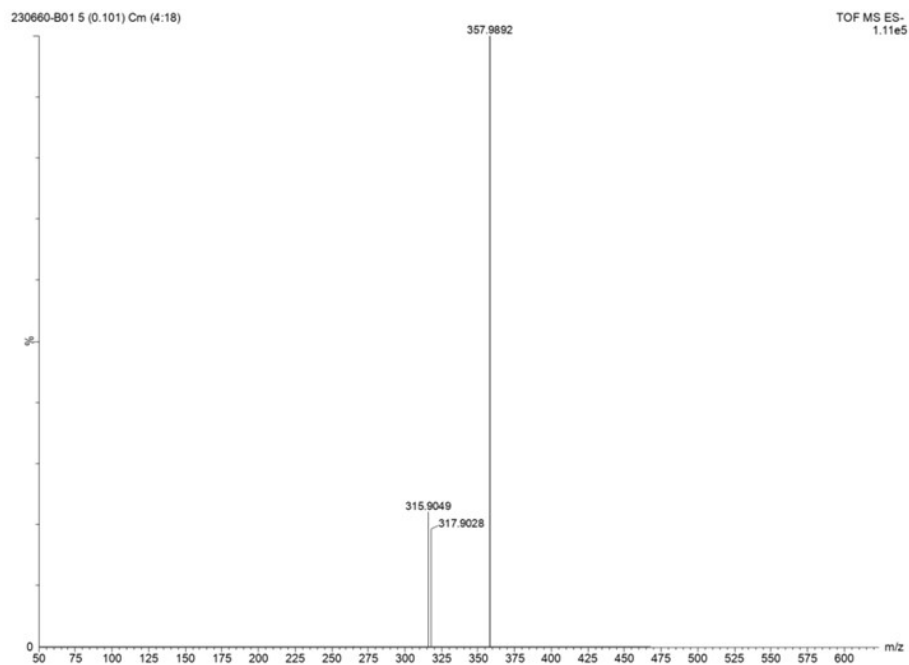

**Fig. S7. Mass spectrum of 4-(4-bromophenoxy)benzene-1,2-dicarbonitrile**

Molecular weight [M]= 301.13 amu

Molecular ion peak m/z of 317.903 for  $[M+H_2O]^{-2}$ , 315.90 for  $[M+H_2O]^{-4}$  and

Base peak of 357.98 for  $[M+3H_2O]^{+2}$

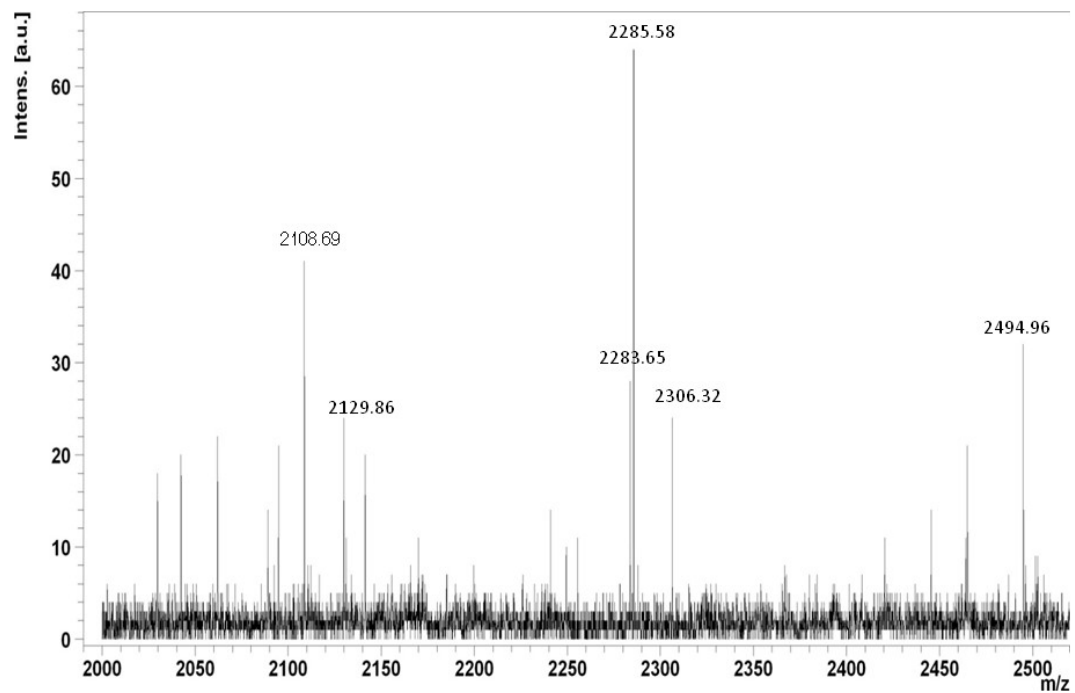

**Fig. S8. Mass spectrum of poly[Co(II)TBBImPc]**

Molecular weight of monomeric [Co(II)TBBImPc], = 2280.21 amu and Molecular ion peak= 2283.65 for  $[M^{+3}]$ , and 2285.58 for  $[M^{+5}]$

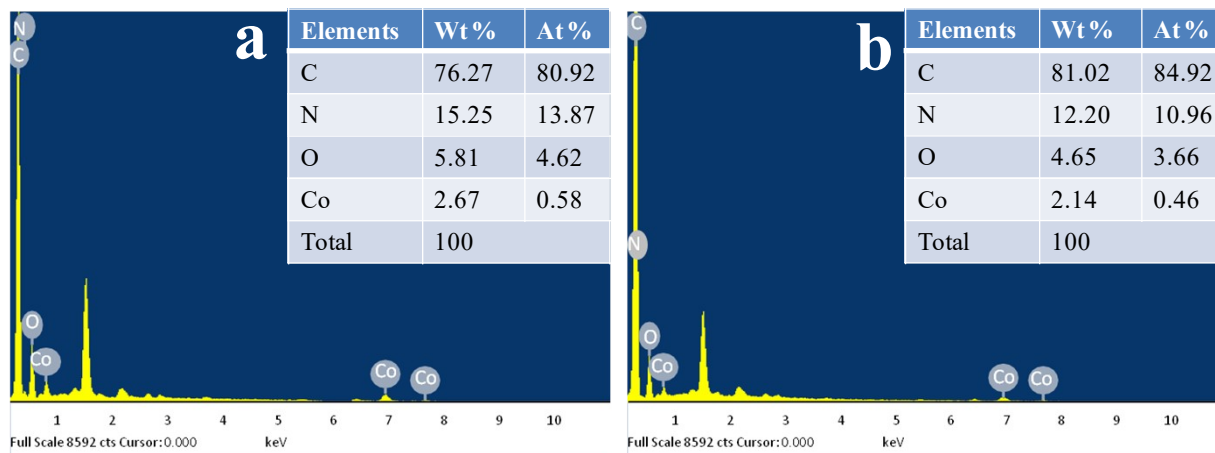

**Fig. S9.** EDX- spectra of (a) poly[Co(II)TBBImPc] and (b) poly[Co(II)TBBImPc]+KB (4:1 ratio) on Toray carbon

### Cyclic voltammetric analysis

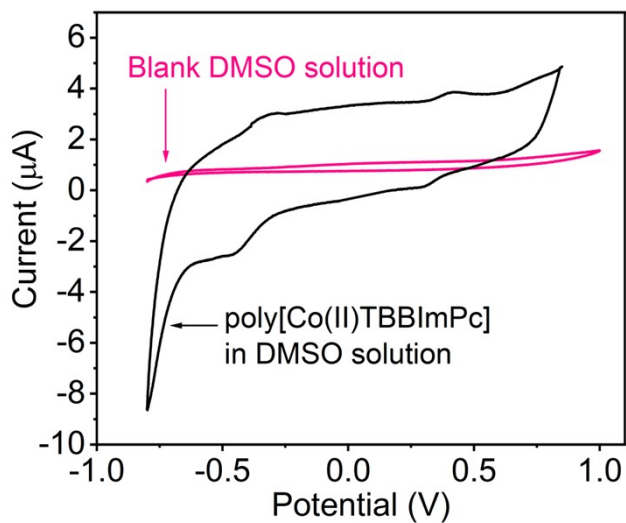

**Fig. S10.** Cyclic voltammograms of (i) bare GCE and (ii) poly[Co(II)TBBImPc] complex in DMSO with 0.1 M TBAP under the N<sub>2</sub> atmosphere at 50 mV.s<sup>-1</sup> scan rate.

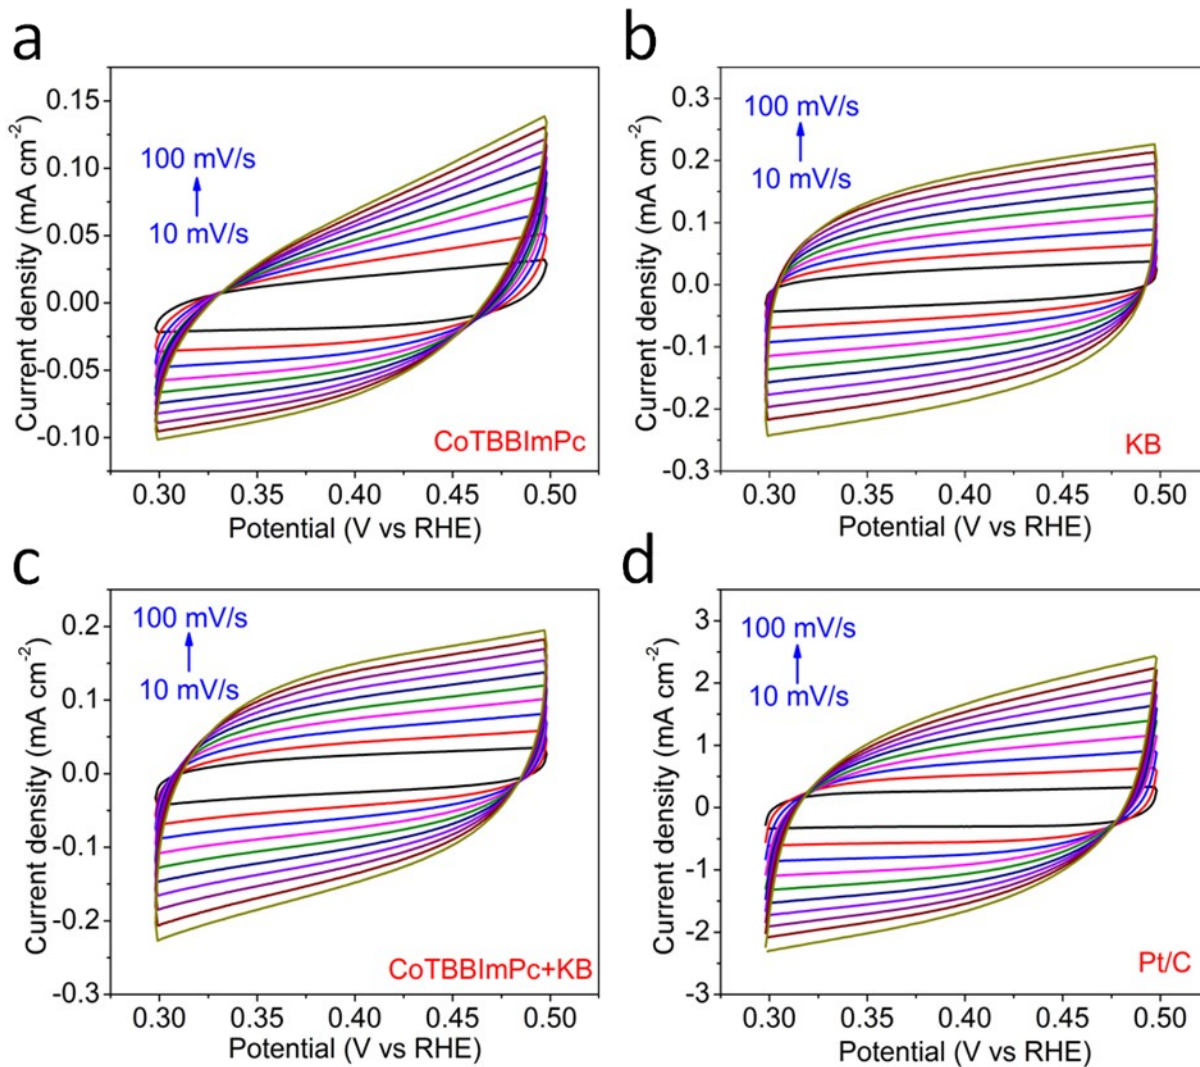

**Fig. S11. (a-d) CVs (non-faradic region +0.30 to +0.50 V (vs RHE) for GCE/poly[Co(II)TBBImpc], GCE/KB, GCE/poly[Co(II)TBBImpc]+KB, and GCE/Pt/C electrodes.**

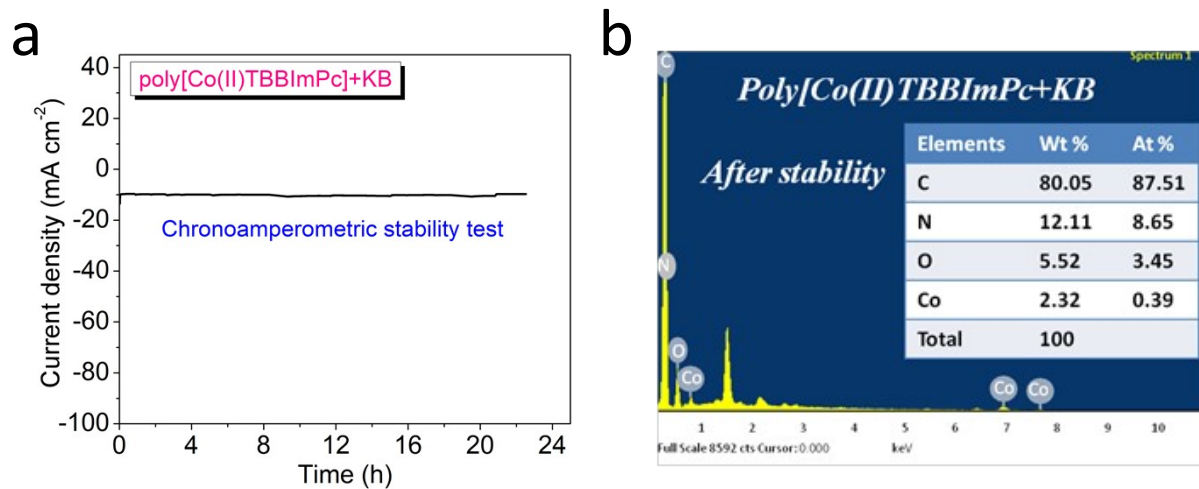

**Fig. S12. (a) Stability study for the poly[Co(II)TBBImPc]+KB hybrid electrode at 10 mA cm<sup>-2</sup> and (b) EDX spectrum of hybrid composite electrode poly[Co(II)TBBImPc]+KB (4:1) after long term stability study test (more than 20 hour) on Toray carbon towards HER in 0.5 M H<sub>2</sub>SO<sub>4</sub>.**

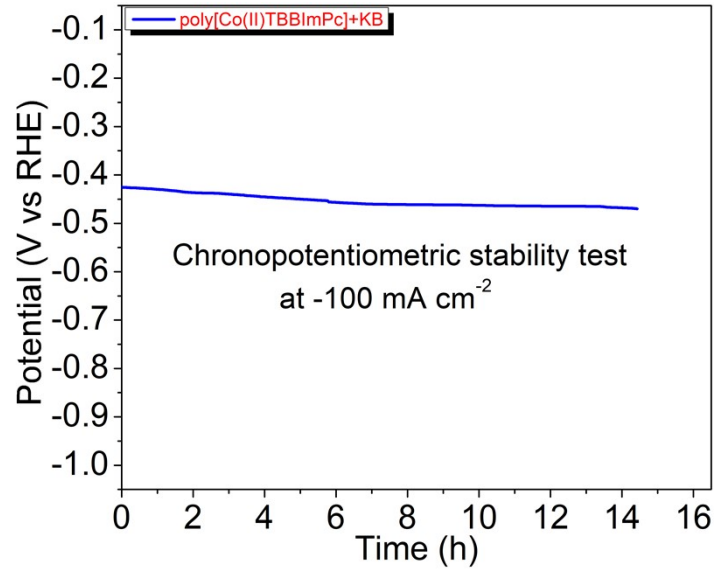

**Fig. S13. Stability study for the poly[Co(II)TBBImPc]+KB hybrid electrode at higher current density.**

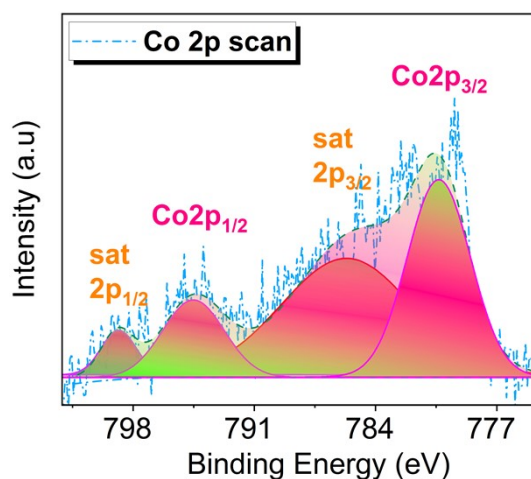

**Fig. S14. Post-Chronoamperometry stability study by XPS analysis: XPS Co2p spectrum of poly[Co(II)TBBImPc]+KB (4:1 ratio)**

The XPS analysis of poly[Co(II)TBBImPc]+KB after the CA studies (Fig 13) was performed in the region of Co2p which exhibited an area under the curve of 3433.35 with area % of 99.939%. and the corresponding Co 2p<sub>3/2</sub>, sat 2p<sub>3/2</sub>, 2p<sub>1/2</sub>, and sat 2p<sub>1/2</sub> peak areas were 1054.23, 1269.89, 472.23, and 637 whereas no Co<sup>3+</sup> peak appeared.

Hence, Total Co area = Sum of (Area of all fitted Co2p peaks)

$$= (\text{Area \% Co}^{2+} + \text{Area \% Co}^{3+})$$

$$= (\text{Area under the curve of Co } 2p_{3/2} + \text{sat } 2p_{3/2} + 2p_{1/2} + \text{sat } 2p_{1/2} \text{ in \%})$$

Therefore,  $\% \text{Co}^{2+} = [\text{Total Area of Co}^{2+} / \text{Total Area of Co}] * 100$

The Co2p<sub>3/2</sub> peak showed a slight positive shift from 780 to 780.34 eV, while the Co2p<sub>1/2</sub> peak exhibited a negligible shift from 794.69 to 794.49 eV. Importantly, the characteristic shake-up satellite peaks remain prominent in both cases (Co2p<sub>3/2</sub> satellite: 785.07 → 785.64 eV; Co2p<sub>1/2</sub> satellite: 799.67 → 798.85 eV), which is a well-established fingerprint of Co<sup>2+</sup> species. These results confirm that cobalt retains its +2 oxidation state even after stability testing.

**Table S1:**

Comparison of HER performance of hybrid composite poly[Co(II)TBBImPc]+KB with various electrocatalysts (in same electrolytic medium) reported in the literature.

| Electrocatalyst       | HER electrocatalytic activity                                   |                                 | Electrolyte                   | Stability                   | Ref          |
|-----------------------|-----------------------------------------------------------------|---------------------------------|-------------------------------|-----------------------------|--------------|
|                       | Overpotential (mV) at $j_{10}$ ( $\text{mA cm}^{-2}$ ) V vs RHE | Tafel slope ( $\text{mV/dec}$ ) |                               |                             |              |
| Co@NG-800             | 286                                                             | 118                             | 0.5 M $\text{H}_2\text{SO}_4$ | 3000 cycles                 | <sup>1</sup> |
| GO-ZnPc               | 474                                                             | 216                             | 0.5 M $\text{H}_2\text{SO}_4$ | 7200 sec                    | <sup>2</sup> |
| WS <sub>2</sub> -CuPc | 285                                                             | 207                             | 0.5 M $\text{H}_2\text{SO}_4$ | -                           | <sup>3</sup> |
| WS <sub>2</sub> -ZnPc | 233                                                             | 186                             | 0.5 M $\text{H}_2\text{SO}_4$ | 24 h                        | <sup>3</sup> |
| Co-NHPC-900           | 230                                                             | 95                              | 0.5 M $\text{H}_2\text{SO}_4$ | 10 h                        | <sup>4</sup> |
| FeCo@N-C/KB           | 240                                                             | 92                              | 0.5 M $\text{H}_2\text{SO}_4$ |                             | <sup>5</sup> |
| CoPc-BCA-D-A-COF      | 65.9                                                            | 75.4                            | 0.5 M $\text{H}_2\text{SO}_4$ | -                           | <sup>6</sup> |
| PyCoPc/GO             | 253                                                             | 96                              | 1.0 M KOH                     | -                           | <sup>7</sup> |
| FePc-MoS <sub>2</sub> | 123                                                             | 32                              | 0.5 M $\text{H}_2\text{SO}_4$ | 20 h                        | <sup>8</sup> |
| Pt/C                  | 23.5                                                            | 29                              | 0.1 M $\text{HClO}_4$         | 29.7% loss in mass activity | <sup>9</sup> |

|                        |     |    |                                      |                      |                      |
|------------------------|-----|----|--------------------------------------|----------------------|----------------------|
|                        |     |    |                                      | after 2000<br>cycles |                      |
| poly[Co(II)TBBImpc]+KB | 190 | 32 | 0.5 M H <sub>2</sub> SO <sub>4</sub> | 23 h                 | <b>This<br/>work</b> |

## References:

1. Yang, J.; Cai, C.; Li, Y.; Gao, L.; Guo, H.; Wang, B.; Pu, B.; Niu, X., In-situ cobalt and nitrogen doped mesoporous graphitic carbon electrocatalyst via directly pyrolyzing hyperbranched cobalt phthalocyanine for hydrogen evolution reaction. *Electrochimica Acta* **2018**, *262*, 48-56.
2. Wang, A.; Li, C.; Zhang, J.; Chen, X.; Cheng, L.; Zhu, W., Graphene-oxide-supported covalent organic polymers based on zinc phthalocyanine for efficient optical limiting and hydrogen evolution. *Journal of Colloid and Interface Science* **2019**, *556*, 159-171.
3. Dekshinamoorthy, A.; Krishnan, K.; Hansda, S.; Vijayaraghavan, S., Tuning the surface electronic structure of WS<sub>2</sub> with Zn- and Cu-phthalocyanine for improved hydrogen evolution reaction: Experimental and DFT investigation. *FlatChem* **2023**, *39*, 100499.
4. Zhang, Z.; Yang, S.; Dou, M.; Ji, J.; Wang, F., Cobalt-nitrogen doped 3D porous carbon prepared with self-generated nanoparticles as sacrificial templates for hydrogen generation. *International Journal of Hydrogen Energy* **2017**, *42* (7), 4193-4201.
5. Noh, S. H.; Seo, M. H.; Kang, J.; Okajima, T.; Han, B.; Ohsaka, T., Towards a comprehensive understanding of FeCo coated with N-doped carbon as a stable bi-functional catalyst in acidic media. *NPG Asia Materials* **2016**, *8* (9), e312-e312.
6. Li, R.; Yang, T.; Zhang, J.; Xu, Z.; Chao, S., CoPc-based donor-acceptor covalent organic frameworks with charge transfer for efficient electrocatalytic oxygen reduction reaction and hydrogen evolution reaction. *International Journal of Hydrogen Energy* **2025**, *98*, 648-656.
7. Chen, L.; Sagar, R. U. R.; Chen, J.; Liu, J.; Aslam, S.; Nosheen, F.; Anwar, T.; Hussain, N.; Hou, X.; Liang, T., Cobalt phthalocyanine as an efficient catalyst for hydrogen evolution reaction. *International Journal of Hydrogen Energy* **2021**, *46* (37), 19338-19346.

8. Kwon, I. S.; Kwak, I. H.; Kim, J. Y.; Abbas, H. G.; Debela, T. T.; Seo, J.; Cho, M. K.; Ahn, J.-P.; Park, J.; Kang, H. S., Two-dimensional MoS<sub>2</sub>/Fe-phthalocyanine hybrid nanostructures as excellent electrocatalysts for hydrogen evolution and oxygen reduction reactions. *Nanoscale* **2019**, *11* (30), 14266-14275.
9. Oh, A.; Kim, H. Y.; Baik, H.; Kim, B.; Chaudhari, N. K.; Joo, S. H.; Lee, K., Topotactic Transformations in an Icosahedral Nanocrystal to Form Efficient Water-Splitting Catalysts. *Advanced Materials* **2019**, *31* (1), 1805546.
